## Microbial retention and resistances in stormwater quality improvement devices

2 treating road runoff

Renato Liguori<sup>1,2</sup>, Steffen H. Rommel<sup>1</sup>, Johan Bengtsson-Palme<sup>3,4</sup>, Brigitte

4 Helmreich<sup>1</sup>, Christian Wurzbacher<sup>1</sup>

### Affiliations:

6 <sup>1</sup> Technical University of Munich, Chair of Urban Water Systems Engineering, Am  
Coulombwall 3, 85748 Garching, Germany

8 <sup>2</sup> Department of Science and Technology, Parthenope University of Naples, Centro  
direzionale Isola –C4, 80143, Napoli, Italy

10 <sup>3</sup> Department of Infectious Diseases, Institute of Biomedicine, The Sahlgrenska  
Academy, University of Gothenburg, Guldhedsgatan 10A, SE-413 46, Gothenburg, Sweden

12 <sup>4</sup> Centre for Antibiotic Resistance Research (CARE) at University of Gothenburg,  
Gothenburg, Sweden

14

Corresponding to: C. Wurzbacher ([christian@wurzbacher.cc](mailto:christian@wurzbacher.cc)), R. Liguori  
16 ([renato.liguori@uniparthenope.it](mailto:renato.liguori@uniparthenope.it))

18

### Abstract

20 Current knowledge about the microbial communities inhabiting the stormwater quality  
improvement devices (SQIDs) for road runoff is scarce. However, as a bioactive compound  
22 of these systems, microbes can facilitate water quality improvement through the  
biodegradation or precipitation of dissolved contaminants. On the other hand, these

24 contaminants may select for stress resistant opportunistic microbial strains, which are  
discharged into surface waters or groundwater. In this study, the microbial community of two  
26 SQIDs with different design were analyzed to determine the microbial load, retention,  
composition, and mobile resistance genes in the filter media and the microbial composition  
28 in the treated runoff. The bacterial abundance of the SQIDs was relatively stable over time  
in effluent water samples. Although the microbes were replaced by new taxa in the effluent,  
30 there was no major retention of cells or microbial genera. The communities were influenced  
both by seasonality and by the SQID design. The heavy metal content of the SQIDs was  
32 correlated to *intl1* and distinct microbial groups. The filter media led to an enrichment and  
subsequent discharge of *Int11* gene cassettes carrying several heavy metal and multidrug  
34 resistance genes (e.g. *czrA*, *czcA*, *silP*, *mexW* and *mexI*). Overall, the results suggest that  
different engineering designs affect the bacterial communities of the SQIDs, and  
36 subsequently influence the microbial community and the genes released with the treated  
water.

38

40 **Keywords:** pollution, traffic area runoff, microbial communities, heavy metals, stormwater  
treatment, manufactured treatment devices, sustainable urban drainage systems

42

## 44 1. INTRODUCTION

46 Industrialization and technological advancement have put an increasing burden on the  
47 environment by releasing large quantities of hazardous contaminants inflicting serious  
48 damage on the ecosystem. Traffic area runoff is widely recognized as a major transport  
49 vector of pollutants released in the urban environment, as it summarizes precipitation and  
50 snowmelt-related discharges of mostly impervious surfaces (e.g. sidewalks, parking lots,  
51 feeder streets, major roads, and highways). The majority of pollution caused by traffic area  
52 runoff originates from vehicle brake emissions, tire wear, lubricating oil and grease, pet  
53 waste and atmospheric deposition on the road surface (1–3). The chemical quality of traffic  
54 area runoff has been analyzed and indicated the presence of different contaminants  
55 including heavy metals, polycyclic aromatic hydrocarbons, polychlorinated biphenyls (PCB),  
56 and other organics (4,5). Heavy metals in traffic area runoff continue to create serious global  
57 health concerns, as they persist in suspended particulate matter and have the ability to travel  
58 long distances through water-air-soil systems with subsequent risks to human health (6).  
59 The awareness of stormwater runoff pollution and increasing concern about its impacts on  
60 the environment, has led to the development of stormwater control measures (SCMs) for  
61 pollution control and contaminant retention from urban road runoff. One SCM to minimize  
62 the contaminant emissions to the environment is the usage of sustainable urban drainage  
63 systems (SUDS) (7,8). These include decentralized technical systems, referred as  
64 stormwater quality improvement devices (SQIDs) or manufactured treatment devices that  
65 treat stormwater runoff with a comparably low footprint, and are particularly suitable in dense  
66 urban environments (7). SCMs have historically been constructed for pollutants and nutrient  
67 reduction from different environments (11,12). Nevertheless, many studies on the impact of  
68 SCMs have also evaluated their function for removal of bacteria, in particular filter-based  
69 bioretention systems have shown fecal bacteria removal efficiencies between 50% and 70%  
70 with significant difference between inflow and outflow concentrations (13,14). Pathogenic

70 bacteria, viruses and protozoa can be found in runoff (15,16) and are transported to surface  
waters through sewer overflows, representing one of the major human health risks (17,18).

72 While the microbial load of sewer overflows has gained considerable attention,  
microbes of traffic area runoff in general are scarcely investigated with only few exceptions.  
74 Due to the heavy pollution and harsh conditions, traffic areas and their runoff can be  
classified as an extreme environment. Early research looked mainly at microbial  
76 communities found in sediments of infiltration basins (19), on the effect of de-icing salts  
(20,21), the biofilm of road gutters (22), or on the denitrification potential of road runoff  
78 receiving biofilters (23). More comprehensive analysis on the microbiology of road runoff are  
missing and most of the microbes and their community functioning in this polluted  
80 environment remain unknown. However, we can assume that they will be of relevance for  
the receiving water bodies (groundwater and surface waters) (24,25). Therefore, an  
82 investigation of these microbial communities can provide insights into adaptations of  
microbial communities to different factors such as pH, contaminants, and heavy metals  
84 (26,27), and shed light on potential microbial risks.

This study is a pioneer study on the microbial community composition and its  
86 anthropogenic signatures in the form of class I integron gene cassettes (*intl1*) of road runoff  
and effluents of SQIDs along a heavily trafficked urban road in Munich, Germany. We  
88 collected water samples for over seven months, and sampled the filter media of the SQIDs.  
The aim of this study is to: (I) identify the major taxa of road runoff and treated effluent, (II)  
90 evaluate the influence of seasonality, engineering design, and heavy metal concentrations  
on microbial communities, (III) identify microbial risk factors in form of the mobile genetic  
92 element *intl1*. This establishes the basis for evaluating the microbial relevance in road runoff,  
its impact on receiving water bodies and how this impact is modulated by current treatment  
94 systems.

## 96 2. MATERIALS AND METHODS

### 98 2.1 Study site

In this study we monitored two different SQIDs (D1, D2, Figure S1) from a heavily trafficked  
100 road in Munich (Germany) with an annual average daily traffic of 24,000 vehicles per day.  
Device D1 and D2 are pre-manufactured SQIDs (SediSubstrator XL 600/12, Fränkische  
102 Rohrwerke Gebr. Kirchner GmbH & Co. KG, Germany; Drainfix Clean 300, Hauraton GmbH  
& Co. KG, Germany). The main difference between the devices were that D1 uses a primary  
104 sedimentation stage and downstream media filtration stage using an iron-based filter  
medium with lignite addition and the filter medium was permanently submerged, while D2  
106 used direct filtration with a carbonate containing sand, which will dry after each rain event.  
After the treatment, the water was percolated into the groundwater. The catchment areas of  
108 the devices were 1660 m<sup>2</sup> for D1 and 165 m<sup>2</sup> for D2.

### 110 2.2 Sampling and characterization

Water samples before and after SQID treatment were withdrawn during a seven months'  
112 timeframe starting from April to October 2019, in order to evaluate different seasonal change  
(spring, summer, autumn). Three different types of water samples were collected based on  
114 the position of sampling: Influent (I): inflow of road runoff to the SQIDs; Effluent after  
sedimentation and adsorption (ESA): effluent of SQID D1; Effluent of Filtration (EF) filtrated  
116 water samples of the SQID D2. The samples were withdrawn volume proportionally using  
automatic samplers (WS 316, WaterSam, Balingen, Germany). Briefly, sampling was  
118 triggered by electro-magnetic flow meters (Krohne Optiflux 2300 C or 1300 C, Krohne IFC  
300 C, DN250 for D1, DN25 for D2), if flow exceeded for 1 min 0.4 L/(s·ha) and stopped if

120 flow was below the threshold value for 15 min. The antecedent dry period (ADP) in hours  
was determined for each runoff event and is defined as the duration with flows smaller than  
122 the threshold value ( $<0.4 \text{ L}/(\text{s}\cdot\text{ha})$ ) prior to a runoff event. The samples were kept in coolers  
at  $4\pm 1 \text{ }^\circ\text{C}$  and transported to the lab within 60 h. Composite samples of each sampling point  
124 and runoff event were prepared for further analysis. Electric conductivity (EC) and pH of the  
samples were analyzed following the standard methods 2510 B and 4500-H+, respectively  
126 (28). Total concentrations of chromium (Cr), copper (Cu), nickel (Ni), lead (Pb) and zinc (Zn)  
were determined after aqua regia digestion according to EN ISO 15587-1:2002. Cd, Cu, Ni,  
128 and Pb were analyzed using ICP-MS (NexION 300D, Perkin Elmer, Waltham, USA). The  
other elements were analyzed using ICP-OES (DIN EN ISO 11885, Ultima II, Horiba Jobin  
130 Yvon, Kyoto, Japan). The limits of quantification (LOQs) were 1.0, 0.1, 0.4, 0.1, and  $2.0 \mu\text{g}/\text{L}$   
for Cr, Cu, Ni, Pb, and Zn, respectively. Dissolved concentrations of Cr, Cu, Ni, Pb, and Zn  
132 were analyzed for a subset of samples after filtration using syringe filter ( $0.45 \mu\text{m}$ , PES,  
VWR International, Darmstadt, Germany). The LOQs of the dissolved Cr, Cu, Ni, Pb, and  
134 Zn concentrations were 2.0, 1.0, 1.0, 1.0, and  $1.0 \mu\text{g}/\text{L}$  respectively.

136 Filter material samples were withdrawn from the SQIDs after approximately 2.75 years of  
operation, labeled FD1 for SQID D1 and FD2 for SQID D2. The surface layer (0-5 cm) in  
138 flow direction of the filter materials, which commonly contain most of the contaminants (29–  
31), was sampled using ethanol cleaned plastic spatulae and a stainless-steel soil sampler.  
140 In addition, we took samples for the microbial community analysis in the middle (5-10 cm)  
and deepest layer (10-15 cm) in the flow direction of the filter materials. The content of Cr,  
142 Cu, Ni, Pb, and Zn in the filter media were analyzed after inverse aqua regia digestion  
adapted from DIN EN 13346:2001 with a  $\text{HNO}_3:\text{HCl}$  ratio of 3:1 using the aforementioned  
144 ICP-MS and ICP-OES devices. The LOQs of Cr, Cu, Ni, Pb, Zn in the filter media were 5.0,

5.0, 2.0, 10.0, and 1.0 mg/kg, respectively. All analysis results for water and filter media  
146 samples below LOQ were substituted by the respective LOQ value.

148 To assess the overall pollution level of the water samples, a water pollution index ( $WPI_{GFS}$ )  
was determined based on the German insignificance threshold values for evaluation of  
150 locally restricted groundwater pollution (*Geringfügigkeitsschwellenwerte*, Table S1), which  
are used to evaluate if a negative anthropogenic effect on groundwater quality is present,  
152 following eq. 1. This method is adapted from Bartlett et al., 2012

$$WPI_{GFS} = \sum \frac{[C_i] / C_{i,GFS}}{n} \quad (1)$$

154 where  $[C_i]$  is the concentration of the substance  $i$  present in the sample,  $C_{i,GFS}$  is the minor  
threshold value of substance  $i$ , and  $n$  is the number of analyzed substances. The heavy  
156 metals Cr, Cu, Ni, Pb, and Zn were considered in this analysis.

### 158 2.3 DNA Extraction and 16S rRNA Gene Sequencing

Water samples collected from the different devices were centrifuged at 5000 rpm for 10  
160 minutes and the pellets were stored at -20 °C, while the sand filter samples were directly  
stored at -20°C until DNA extraction. The DNA was extracted using the FastDNA Spin Kit  
162 for Soil (MP Biomedicals, Solon, USA), following the manufacturers protocol. The DNA  
concentration of the individual extracts was quantified fluorimetrically (QFX Fluorometer,  
164 DeNovix, Wilmington, DE), then stored at -80 °C until sequencing. The 16S rRNA gene  
sequencing was performed at ZIEL using the primers 341F/806R targeting mainly bacteria  
166 (Institute for Food & Health at Technical University of Munich, Germany). All the data are  
generated using a MiSeq sequencer (Illumina technology, v3 chemistry).

168

## 2.4 Data Analysis and Quality Control

170 All 16S rRNA gene amplicons were processed using the open-source bioinformatic pipeline  
DADA2 (version 1.14.1, Callahan et al., 2016) for R (version 3.6.0) (35). Demultiplexing and  
172 quality filtering were carried out in DADA2 using customized settings (`truncLen=c(290,200)`,  
`trimLeft = c(14,12)`, `maxN=0`, `maxEE=c(2,6)`) after the removal of the primers sequence.  
174 Error rates were subsequently estimated from a set of subsampled reads (1 million random  
reads), and chimeric sequences were identified and removed from the demultiplexed reads.  
176 The exact amplicon sequence variants (ASVs) were taxonomically classified with a naïve  
Bayesian classifier using the Silva v. 138 training set  
178 (<https://benjjneb.github.io/dada2/training.html>, accessed August 2020). Negative controls  
were included at every step of processing, from DNA extraction through the library  
180 preparation. A subset of control samples were sequenced in sequencing runs to verify that  
methodological errors did not impact results. Samples that shared dominant taxa with  
182 negative controls were removed from the dataset.

## 184 2.5 Quantitative Polymerase Chain Reaction (qPCR)

A quantitative Polymerase Chain Reaction (qPCR) protocol was performed to quantify the  
186 number of 16S rRNA and *int11* gene copies within samples. 16S rRNA was quantified by  
16S Forward 5'-GACTCCTACGGGAGGCWGCAG-3'; 16S Reverse: 5'-  
188 GTATTACCGCGGCTGCTGG-3' (36). *Int11* was amplified with the *int11* primers from (37).  
The qPCR for 16S rRNA was carried out with a reaction mixture containing 10.5 µL GoTaq®  
190 qPCR Master Mix (2X) (Promega, Madison, USA), 0.2 µM of each primer, 7.5 µL nuclease  
free water and 1 µL of template for a total volume of 21 µL. The 16S rRNA qPCR program  
192 consisted of 2 min at 95 °C, 40 cycles with 5 s at 95 °C, 30 s at 60 °C, while for *int11* the  
program was 4 min at 95 °C, 40 cycles with 10 sec at 95 °C, 45 s at 64 °C. Both were  
194 performed using the CFX96 thermocycler (BioRad, Hercules, USA). Calibration curves for



*intl1* were obtained using serial dilutions of a purified PCR products (by NGSBeads, Steinbrenner, Wiesenbach, Germany, following the manual) derived from wastewater. Calibration curves for 16S rRNA were obtained by serial dilutions of a linearized plasmid (pGEM-T easy, Invitrogen, Carlsbad, USA) carrying a single amplicon variant. Specificity of PCR reactions was checked by melt curves, and potential false positives were removed. All samples were analyzed in technical duplicates to obtain final copy numbers per sample by averaging.

202

## 2.6 *Intl1* gene cassette sequencing

Genomic DNA from three effluent water and two filter material samples of the devices D1 and D2, was used for characterization of class 1 integron gene cassette arrays (*intl1*). The cassette arrays of Tn402-associated class 1 integrons were amplified using the primers HS458 and HS459 (38). These primers target the integron recombination site, and the 3' end of the cassette array, which normally terminates in the *qacEΔ/sul1* gene fusion. Sequencing of HS458/459 PCR products can thus recover resistance determinants. The library collection was carried out with the following cycling program: 94 °C for 3 min; 94 °C for 30 s, 55 °C for 30 sec, 72 °C 1 min 30 s for 35 cycles and 72 °C for 5 min. Amplicon sequencing was performed using MinION (Oxford Nanopores Technologies, Oxford, UK) using the LSK-109 library preparation according to the manufacturers recommendations and a Flongle flow cell generating 622,526 reads with the high accuracy basecalling mode (MinKnow version 19.10.1).

216

## 2.7 *Intl1* gene analysis

MinION fastq reads were converted to FASTA format using pefcon (part of the PETKit,, Bengtsson-Palme, 2012) and translated into all six reading frames using the EMBOSS transeq tool (39), options “-trim -clean -frame 6”. Resistance genes were identified using

220

local Usearch (40) against the ResFinder (41), FARME (42) and BacMet experimentally  
222 confirmed (43) databases with 70% identity threshold (options “-id 0.7 -blast6out out.blastp  
-evaluate 0.001”). Prior to this search, the FARME database was filtered to contain only actual  
224 antibiotic resistance protein sequence, following the protocol in (44). A similar approach was  
taken to identify markers for mobile genetic elements, using the MGEDB as reference (45)  
226 (usearch local options “-id 0.7 -blast6out out.blastp -strand both”). The six-frame translations  
were also scanned against Pfam (46) using HMMER (using defined trusted thresholds, the  
228 “--cut\_tc” option). All annotations were added to a FARAO annotation database (47). Lists  
of annotated integron regions were then produced by querying the FARAO database with  
230 different criteria.

## 232 2.8 Statistical Analysis

Statistical analysis of the microbial community composition was performed by converting the  
234 ASV table produced by DADA2 into phyloseq objects using the “phyloseq” package  
(v.1.24.2) in R (v 3.6.0) (35,48). The microbial diversity indices were analyzed using the  
236 “vegan” and “betapart” package from CRAN (49,50). The Shannon index was used for the  
alpha diversity while ASV richness estimate was determined by rarefying the amplicon  
238 dataset to the smallest sample (3538). Kruskal-Wallis was used to test significant differences  
between experimental conditions. Differential abundance analysis of taxa to identify the  
240 removal/replacement of microbes before and after the SQIDs was performed by DESeq2 (v  
1.29.5) (51). To gain insight about the overall microbial retention exerted by the SQIDs, we  
242 partitioned the  $\beta$ -diversity into two components: turnover ( $\beta$ -sim) and nestedness ( $\beta$ -ness)  
(50). Multivariate statistics were investigated with generalized linear models (GLMs) for  
244 multivariate abundance data using the mvabund package (52). Predictive models were fitted  
using “negative.binomial” family, often being appropriate for count data, with the mean–  
246 variance function tending to be quadratic rather than linear. Non-metric multi-dimensional

Scaling (NMDS) was used to visualize the microbial community composition and how it  
248 aligned with different variables (heavy metals, *intl1*, sample type). The *intl1* data were further  
normalized by the 16S rRNA copy numbers. The qPCR data (16S rRNA, *intl1*) were log-  
250 transformed prior to statistical analysis. We used the BioEnv approach (53) to examine the  
best subset of environmental variables, correlating with community dissimilarities. In  
252 addition, to explore the correlation between microbial community's relative abundance,  
heavy metals, and *intl1* gene abundances, Spearman correlations were calculated. To test  
254 if the heavy metal could predict the bacterial composition, we assessed the significance of  
the correlation using the "adonis2" function in vegan (54) (v 3.6.0). The relationship between  
256 heavy metals and *intl1* gene abundance we tested by a Spearman correlation.

## 258 2.9 Data availability

The sequence data (Microbial community and *intl1* amplicon data) is deposited at ENA  
260 (<https://www.ebi.ac.uk/ena>) under the accession number: PRJEB41986. The underlying  
ASV and metadata table can be found in the Supplementary Material  
262 (Water\_Runoff\_ASV\_Table.csv, Water\_Runoff\_Metadata.csv, Sand\_Filters\_ASV\_Table.csv  
, Sand\_Filters\_Metadata.csv).

264

## 3. RESULTS

### 266 3.1 Physico-chemical properties of road runoff, effluent of the SQIDs and filter media

As already described for this site by Helmreich et al. (55), the analyzed road runoff (influent)  
268 concentrations for of Cr, Cu, Ni, Pb, and Zn showed seasonal variation with higher  
concentrations observed in spring (and winter) (Table 1). The higher EC in the spring  
270 samples indicate the influence of de-icing salt (sodium chloride) applied on-site, which  
contribute significantly to the toxicity of road runoff (33). As a consequence of the neutral to  
272 slightly alkaline pH of the samples, heavy metals were predominantly found in the particulate

phase in the influent of the SQIDs. The dissolved Pb concentrations were below LOQ, as  
274 were half of the dissolved Cr and Ni concentrations. Consequently, it was only possible to  
determine the dissolved fractions of Cu and Zn, which were in median 18 and 21%. The  
276 overall pollution level, as indicated by the  $WPI_{GFS}$ , of the SQID effluents was lowered with  
lowest total heavy metal contamination in EF. In ESA 18% of Cu and 38% of Zn were  
278 dissolved. In EF larger dissolved fractions were observed: 63% Cu and 40% Zn. In the filter  
material sample FD1 showed higher Ni contents than in FD2, but showed lower values for  
280 the residual metals, respectively.

### 282 3.2 Microbial parameters of road runoff and SQID systems

The investigated SQIDs were colonized by a diverse range of microbial taxa. About 7,538  
284 unique amplicon sequence variants (ASV) were detected for water samples (I, ESA, EF)  
and 5,599 in filter material FD1 and FD2 (Table 2). The biomass ranged in the order of  $10^8$ -  
286  $10^9$  cells per ml water measured as 16S rRNA gene copies. The copy numbers in the filter  
material was in the range of  $10^7$  copies per gram material. The class I integron gene cassette  
288 *intl1* copy numbers had high numbers in the filter material and in water samples of D1 device.  
Neither strong seasonal effects nor differences between the filter materials in terms of  
290 biomass levels, with only slightly elevated values in summer were detected. When  
comparing the two devices, D1 effluent showed significantly higher biomass and *intl1* values  
292 than D2 effluent (3.6 times higher biomass and 12.8 times higher *intl1* in ESA than in EF,  $p$   
 $Kruskal-Wallis < 0.05$ ), while having a lower diversity index. Compared to the influent, only D2  
294 showed an increase in terms of microbial diversity (Table 3).

### 296 3.3 Microbial taxa of road runoff

In both systems, the most prevalent phyla consisted of Proteobacteria, – mainly composed  
298 by Gammaproteobacteria and Alphaproteobacteria, followed by Actinobacteriota, and

Bacteroidota (Fig.2A). The main difference between the two devices was an increased  
300 proportion of Campilobacteriota for D1 that had itself established in the intermediate ESA  
(7%). At the genus level many genera ranged below 2% relative abundance (Fig. 2B). Most  
302 of the dominant genera like *Massilia*, *Alkanindiges*, *Sphingomonas*, *Hymenobacter*,  
*Acidovorax* and *Arthrobacter* that were found in the influent were still present in ESA. The  
304 ESA water samples showed a dominance of *Pseudarcobacter* (8%). In contrast to the water  
samples, the biofilm grown on the filter media of the SQIDs were clearly distinct (with minor  
306 vertical changes between the filter horizons; Figure S2). For both filter media, the most  
prevalent phyla of the biofilm consisted of Gammaproteobacteria and Alphaproteobacteria,  
308 followed by Actinobacteriota, Bacteroidota, Acidobacteriota, Chloroflexi, Desulfobacterota  
and Firmicutes (Fig.2A). On the genus level, *Hydrogenophaga* and *Rhodoferax* (4.7% and  
310 4.1%, respectively) were the dominant *taxa* in FD1 column, while *Arenimonas* (3.4%) and  
*Sphingomonas* (2.8%) dominated FD2 (Fig. 2B)

312

#### 3.4. Retention of microbes by SQIDs

314 By partitioning the  $\beta$ -diversity into loss of species (nestedness) and species turnover, we  
could confirm that we mainly see a turnover of *taxa* (as ASV) between influent and effluent  
316 of D1 (turnover = 0.81, nestedness = 0.04) and D2 (turnover = 0.90, nestedness = 0.02),  
pointing to rather a replacement of species along the water's flow of the SQIDs, than a  
318 species loss along the environmental gradient (Overall nestedness = 0.03). Differential  
abundances of microbial genera pointed to few differentially enriched genera for D1 and D2  
320 (Figure S3). In D1 few genera showed up, but a high enrichment of C39 (Rhodocyclaceae;  
log<sub>2</sub> fold change of 28.5) was observed. In D2, a stronger removal was detected with 15  
322 different genera with up to 21.2 log<sub>2</sub> fold change. On the ASV level, we identified several  
potential microbial risk factors, i.e., *taxa* that are derived from animal host systems and may  
324 be relevant for human health and hygiene (e.g. *Erysipelothrix*, *Shigella*, *Escherichia*, Table

S2). The majority of these taxa were mostly found at very low relative abundances in the  
326 road runoff (<0.08%). Among the potential bacterial pathogens, the  
genus *Pseudomonas* was dominant in all samples followed by *Corynebacterium* in the  
328 effluent ESA.

### 330 3.5 Factors that influence the microbial community composition

Multivariate statistics separates the two effluent water samples EF and ESA, and further  
332 point to single metals, pH, and *int11* as additional influencing factors (Figure 2, Table S3).  
Moreover, seasonal changes and heavy metals (as sum of Cr, Cu, Ni, Pb and Zn molarity),  
334 impacted the species composition of the effluent samples (GLM: LRT = 12395, LRT = 9350,  
 $p = 0.006$  and  $p = 0.03$ , respectively). However, only D2 had a significant structuring effect  
336 on the microbial community when comparing influent and effluent for each device alone  
(LRT = 6741,  $p = 0.013$  for D2 vs. LRT = 4741,  $p = 0.08$  for D1).

338

### 3.6 The influence of heavy metals on microbial taxa

340 In order to gain more insight on the role of heavy metals, we preselected the most predictive  
metals using bioenv, which indicated a significant influence of Ni, Zn and Cu on the microbial  
342 community (adonis2 for the total model:  $R^2 = 0.28$ ,  $p < 0.001$ ). Likewise, the biomass  
normalized *int11* abundance showed linear relationships with the heavy metals  
344 concentrations Ni, Pb, and Zn with higher explanatory power for Ni and Zn ( $R^2 > 0.71$ ,  $p <$   
 $0.001$ ; Figure 3). This was further explored by co-correlating the most abundant 30 phyla  
346 and 50 genera with, heavy metals, and *int11* (Figure 4). A total of 6 phyla showed positive  
correlations: Campilobacterota, Desulfobacterota, Fibrobacterota, Firmicutes,  
348 Fusobacteriota and Halobacterota, were positively correlating with Ni ( $R^2 > 0.45$ ,  $p < 0.05$ )  
and Zn ( $R^2 > 0.45$ ,  $p < 0.05$ ). The analysis highlighted sensitive phyla, negatively correlating

350 with the measured metals (Acidobacteriota, Abditibacteria, Bdellovibrionota, Chloroflexi and  
Proteobacteria). Seventeen bacterial genera positively correlated with the metal  
352 concentrations, with *Aquabacterium*, *Hydrogenophaga* and *Trichococcus* associated with  
almost all the measured metals. Three out of the five heavy metals (Ni, Pb and Zn) showed  
354 the highest positive association with the relative abundance of genera ( $R^2 > 50$ ,  $p < 0.05$ ).  
On the other hand, *Aeromonas*, *Aquicella*, *Legionella* and *Pseudomonas* were showing  
356 significantly negative correlations to heavy metals. These lineages were also found at a  
lower abundance in the ESA, which displayed higher heavy metal concentrations and an  
358 increased microbial and *intl1* parameters than in the EF (Table 2).

### 360 3.7 The role of *intl1* in facilitating heavy metal resistances

Three phyla were also co-correlating with *intl1* (Campilobacterota, Fusobacteriota and  
362 Halobacterota,  $R^2 > 0.5$ ,  $p > 0.05$ , Figure 4). Eleven genera showed significantly positive  
correlations with *intl1* (*C39*, *Dechloromonas*, *Ferribacterium*, *Flavobacterium*,  
364 *Hydrogenophaga*, *Limnohabitans*, *Polynucleobacter*, *Pseudarcobacter*, *Trichococcus* and  
*Zoogloea*,  $R^2 > 0.45$   $p < 0.05$ ). To further test these potential linkages of *intl1* and heavy  
366 metal resistance, we sequenced parts of the genes that were carried by the class 1 integrons  
in the systems. In total, 296 of the 622,526 reads from the integrons (0.05%) contained 98  
368 different resistance genes. Of these, 82 were metal or biocide resistance genes (BacMet),  
7 were clinically relevant antibiotic resistance genes (ResFinder) and 11 were antibiotic  
370 resistance genes previously only encountered in functional metagenomics studies  
(FARME). The most common antibiotic resistance genes were aminoglycoside resistance  
372 genes *aadA5* (found on 6 integron sequences) and *aadA4* (3 sequences), and  
fluoroquinolone efflux pump *oqxB* (4 sequences). Four other genes (*aac(3)-Ia*, *aac(3)-Ib*,  
374 *msr(D)* and *vat(E)*) were found only once. Most of the identified genes were involved in metal  
resistance, most commonly to heavy metals such as Pb, Cd and Zn (Figure 5). Cu and Ag

376 resistance genes constituted around 13% of the identified genes, while antibiotic resistance  
genes accounted for 8.6% of the identified genes in total. Biocide resistance genes made  
378 up approximately one-third of the identified resistance genes. The most commonly  
encountered resistance genes (> 6 occurrences) were the metal resistance genes *czrA*,  
380 *czcA* and *silP*, the biocide resistance gene *qacE*, and the efflux pumps *mexW* and *mexI* that  
also facilitate multidrug resistance (Table S4).

382

#### 4. DISCUSSION

384 The results revealed that SQIDs not only retain heavy metals from road runoff, but also  
change the microbial community composition, alter the microbial load, and influence the  
386 mobile genetic elements. The overall analysis of the road runoff and the SQID samples  
indicated a predominance of Gammaproteobacteria, Actinobacteriota and Bacteroidota in  
388 the water and the respective biofilms. These findings are consistent with previous reports,  
where these phyla have been identified in stormwater runoff as anthropogenic or erosion  
390 signatures (56–58). Similarly, the taxa that occurred in the SQID filter materials, like  
*Desulfobacterota*, *Chloroflexi* and *Acidobacteriota*, were all previously observed in an  
392 infiltration basin collecting highway runoff (19). *Acidobacteriota* are mainly found in low pH  
environments (59) tolerating various pollutants such as PCBs, petroleum compounds  
394 (60,61) and heavy metals (62). Only few taxa with pathogenic potential were present at low  
levels, and SQIDs are not designed for microbial retention, but their occurrence in the road  
396 runoffs warrants further investigation, in particular when the water treatment selects for  
mobile genetic elements and when the receiving waters are considered as critical resource.

398

##### 4.1 Influence of heavy metals on the microbial community

400 Heavy metals with high concentrations in waters or soils show toxic effects to almost all  
microbes by affecting metabolic functions such as protein synthesis (63,64), thus leading to



402 variations in microbial biomass and diversity (65). Several studies have shown how Cu, Zn,  
Pb and other heavy metals severely inhibited microbial biomass and could cause a reduction  
404 of microbial  $\alpha$ -diversity (66). The most common conclusion is that only high concentrations  
can significantly decrease bacterial biomass, whereas mid-low concentrations of heavy  
406 metals can increase microbial biomass and stimulate microbial growth (67,68). Our pH and  
metal measurements indicated that large fractions of the heavy metals are not readily  
408 bioavailable, nevertheless particulate-bound heavy metals are considered partly  
bioavailable (69). Anoxic conditions in particular may favor metal reduction as a source of  
410 energy, which generally leads to the release of metal ions into the water (e.g., Teiri et al.,  
2016). The prevalence of Desulfobacterota, which are responsible for sulfate reduction  
412 processes in stormwater retentions ponds (71), together with Chloroflexi that constitute a  
substantial proportion of the activated sludge community in wastewater treatment plants  
414 (72), point to anoxic processes that may occur in the SQID systems.

#### 416 4.2. Heavy metal resistances are linked to *intl1*

Ni and Zn, that showed an influence on the microbial community composition are known  
418 to induce different resistance mechanisms in bacterial metabolism (73–75). In this context,  
one interesting case was *Arcobacter* (and *Pseudoarcobacter*; Pérez-Cataluña et al., 2018),  
420 which was abundant in water and filter material. *Arcobacter* is known to form biofilms in  
various pipe surfaces, such as stainless steel, Cu, and plastic, colonizing water distribution  
422 systems (77,78). In our case, *Pseudoarcobacter* mainly correlated to Ni and Zn and showed  
a strong correlation with *intl1* gene abundance. Both, metal and antibiotic resistance are  
424 commonly carried on mobile genetic elements. Integrons, in particular, have been  
recognized as marker for anthropogenic pollution (79). Prior research from different heavy  
426 metal polluted scenarios showed the development of resistances due to horizontal gene  
transfer (80,81), and there have been signs of co-selection of several resistant genes linked

428 to clinically relevant antibiotic resistance (82). For example, resistance to As, Mn, Co, Cu,  
Ag, Zn, Ciprofloxacin,  $\beta$ - lactams, chloramphenicol and tetracycline is achieved by reduction  
430 in membrane permeability (83,84). Similarly Cu, Co, Zn, Cd, tetracycline, chloramphenicol  
and  $\beta$ - lactams resistance is achieved through rapid efflux of metal or antibiotic (85,86).  
432 Therefore, heavy metals have potential to represent extended selection pressure for  
development of antibiotic resistance in microorganisms (87), and the transfer of these  
434 resistant bacteria in the environment may pose potential risks to human health (88).

#### 436 4.3. Stormwater quality improvement devices as hot spots for horizontal gene transfer

The *intl1* gene cassette analysis highlighted the presence of heavy metal resistances  
438 microbial communities, and the very high abundance of *intl1* in the filter media suggests a  
strong selection pressure that aligns with a significant rate of horizontal gene transfer that  
440 takes place in the systems. Horizontal gene transfer plays an important role in the evolution,  
diversity and recombination of multi-drug resistant strains (89,90). The class 1 integron has  
442 been associated with the presence of metal resistance genes (MRGs) and antibiotic  
resistance genes (ARGs) (91,92). Our data suggests that SQIDs could be a high-risk  
444 environment for resistance development, similar to other hotspots, like manure, sewage and  
municipal solid waste (93–95). Furthermore, the presence of different resistance genes (e.g.  
446 *czrA*, *czcA* and *silP*), including the high proportion of multidrug resistance genes (e.g. *mexW*,  
(96,97)) as well as the strong positive correlations to heavy metals, suggest that integrons  
448 contribute to the spread of MRGs and ARGs within road runoff drainage systems. While no  
typical antibiotic treatment related resistance genes (*sul1*, *ampC*, etc.) were identified, they  
450 may be present on other mobile genetic elements.

#### 452 4.4. Limitations and future directions

This study provides a first deeper description of road runoff microbial communities and  
454 contributes to our understanding of their potential environmental impact on the receiving  
water bodies. As a pioneer study, our study design was limited to two SQIDs and we could  
456 only monitor three seasons. Thus, we could not investigate if there are further effects by e.g.  
higher amounts of de-icing salts in winter, which potentially enhance mobility and  
458 bioavailability of the present heavy metals (33,98,99). Furthermore, we did not consider  
other systems such as infiltration basins or sand filters, and it remains an open question if  
460 our results are transferable to other road runoff drainage systems. However, it is obvious  
that runoff from a highly trafficked urban road carries a high microbial load with dominant  
462 signs of anthropogenic pollution. This comes with a relatively high risk related to the cycling  
of resistance genes and thus microbial risk mitigation practices should be considered in the  
464 future. Recently, it has become clear that microbes are critically linked to our changing  
environment, and that they have to be included in future policies (100). Future studies are  
466 therefore encouraged to assess the risks of discharge of microbes and their resistance  
genes from SQIDs and other SCMs into receiving environments.

## 468 **5. ACKNOWLEDGEMENT**

We would like to thank Heidrun Mayrhofer and Hubert Moosrainer for technical assistance.  
470 RL acknowledges the International PhD Programme “Environment, Resources and  
Sustainable Development” scholarship (#Parthenope University of Naples), monitoring of  
472 the SQIDs by BH and SR was funded by the Bavarian Environment Agency (AZ: 67-0270-  
96505/2016 and AZ: 67-0270-25598/2019). JBP was supported by the Sahlgrenska  
474 Academy at the University of Gothenburg, the Swedish Research Council (VR; grant 2019-  
00299) under the frame of JPI AMR (EMBARK; JPIAMR2019-109), and the Centre for  
476 Antibiotic Resistance Research at the University of Gothenburg (CARE). CW was financially  
supported by TUM Junior Fellowship and the DFG project (WU 890/2-1). We would like to

478 thank Dr. Klaus Neuhaus of the ZIEL Core Facility Microbiome, Technical University of  
Munich, Freising, Germany, for sequencing.

## 480 **6. COMPETING INTERESTS**

M.Sc. Liguori, Dr. Wurzbacher, and Dr. Bengtsson-Palme declare no competing interests.  
482 M.Sc. Rommel, and Dr. Helmreich, informed the Bavarian Environment Agency, as well as  
the SQID companies Fränkische Rohrwerke and Hauraton on the content of this article  
484 prior to submission.

## **7. REFERENCES**

- 486 1. Adachi K, Tainosho Y. Characterization of heavy metal particles embedded in tire dust. *Environ Int.*  
2004;
- 488 2. Ball JE, Jenks R, Aubourg D. An assessment of the availability of pollutant constituents on road  
surfaces. *Sci Total Environ.* 1998;
- 490 3. Legret M, Pagotto C. Evaluation of pollutant loadings in the runoff waters from a major rural  
highway. In: *Science of the Total Environment.* 1999.
- 492 4. Eriksson E, Baun A, Mikkelsen PS, Ledin A. Chemical hazard identification and assessment tool for  
evaluation of stormwater priority pollutants. *Water Sci Technol.* 2005;
- 494 5. Huber M, Welker A, Helmreich B. Critical review of heavy metal pollution of traffic area runoff:  
Occurrence, influencing factors, and partitioning. *Science of the Total Environment.* 2016.
- 496 6. Markiewicz A, Björklund K, Eriksson E, Kalmykova Y, Strömvall AM, Siopi A. Emissions of organic  
pollutants from traffic and roads: Priority pollutants selection and substance flow analysis. *Sci Total*  
498 *Environ.* 2017;
- 500 7. Dierkes C, Lucke T, Helmreich B. General technical approvals for decentralised sustainable urban  
drainage systems (SUDS)-the current situation in Germany. *Sustain.* 2015;

8. Lucke T, Nichols P, Shaver E, Lenhart J, Welker A, Huber M. Pathways for the Evaluation of  
502 Stormwater Quality Improvement Devices – the Experience of Six Countries. *Clean - Soil, Air, Water*.  
2017.
- 504 9. Davis AP, Shokouhian M, Ni S. Loading estimates of lead, copper, cadmium, and zinc in urban runoff  
from specific sources. *Chemosphere*. 2001;
- 506 10. Tedoldi D, Chebbo G, Pierlot D, Kovacs Y, Gromaire M-C. Impact of runoff infiltration on contaminant  
accumulation and transport in the soil/filter media of Sustainable Urban Drainage Systems: A  
508 literature review. *Sci Total Environ* [Internet]. 2016;569–570:904–26. Available from:  
<http://www.sciencedirect.com/science/article/pii/S0048969716309391>
- 510 11. Huber M, Welker A, Dierschke M, Drewes JE, Helmreich B. A novel test method to determine the  
filter material service life of decentralized systems treating runoff from traffic areas. *J Environ*  
512 *Manage*. 2016;
12. Hilliges R, Schriewer A, Helmreich B. A three-stage treatment system for highly polluted urban road  
514 runoff. *J Environ Manage*. 2013;
13. Hathaway JM, Hunt WF, Jadlocki S. Indicator bacteria removal in storm-water best management  
516 practices in charlotte, north carolina. *J Environ Eng*. 2009;
14. Pennington SR, Kaplowitz MD, Witter SG. Reexamining best management practices for improving  
518 water quality in urban watersheds. *J Am Water Resour Assoc*. 2003;
15. Ahmed W, Hamilton K, Toze S, Cook S, Page D. A review on microbial contaminants in stormwater  
520 runoff and outfalls: Potential health risks and mitigation strategies. *Science of the Total*  
*Environment*. 2019.
- 522 16. Pandey PK, Kass PH, Soupier ML, Biswas S, Singh VP. Contamination of water resources by pathogenic  
bacteria. *AMB Express*. 2014;
- 524 17. Page D, Dillon P, Toze S, Bixio D, Genthe B, Jiménez Cisneros BE, et al. Valuing the subsurface

- pathogen treatment barrier in water recycling via aquifers for drinking supplies. *Water Res.* 2010;
- 526 18. Ma Y, Egodawatta P, McGree J, Liu A, Goonetilleke A. Human health risk assessment of heavy metals  
in urban stormwater. *Sci Total Environ.* 2016;
- 528 19. Rotaru C, Woodard TL, Choi S, Nevin KP. Spatial Heterogeneity of Bacterial Communities in  
Sediments from an Infiltration Basin Receiving Highway Runoff. *Microb Ecol.* 2012;
- 530 20. Ostendorf DW, Palmer RN, Hinlein ES. Seasonally varying highway de-icing agent contamination in a  
groundwater plume from an infiltration basin. *Hydrol Res.* 2009;
- 532 21. Ostendorf DW, Rotaru C, Hinlein ES. Steady Groundwater Transport of Highway Deicing Agent  
Constituents from an Infiltration Basin. *J Irrig Drain Eng.* 2008;
- 534 22. Hervé V, Lopez PJ. Analysis of interdomain taxonomic patterns in urban street mats. *Environ  
Microbiol.* 2020;
- 536 23. Luo Y, Yue X, Duan Y, Zhou A, Gao Y, Zhang X. A bilayer media bioretention system for enhanced  
nitrogen removal from road runoff. *Sci Total Environ.* 2020;
- 538 24. Lee S, Suits M, Wituszynski D, Winston R, Martin J, Lee J. Residential urban stormwater runoff: A  
comprehensive profile of microbiome and antibiotic resistance. *Sci Total Environ.* 2020;
- 540 25. Scharping RJ, Garey JR. Relationship between aquifer biofilms and unattached microbial indicators  
of urban groundwater contamination. *Mol Ecol.* 2020;
- 542 26. Kaevska M, Videnska P, Sedlar K, Slana I. Seasonal changes in microbial community composition in  
river water studied using 454-pyrosequencing. *Springerplus.* 2016;
- 544 27. Liao H, Chapman SJ, Li Y, Yao H. Dynamics of microbial biomass and community composition after  
short-term water status change in Chinese paddy soils. *Environ Sci Pollut Res.* 2018;
- 546 28. Bruno L. Standard Methods for the Examination of Water and Wastewater , 23rd Edition. *Journal of  
Chemical Information and Modeling.* 2017.
- 548 29. Hatt BE, Fletcher TD, Deletic A. Hydraulic and pollutant removal performance of fine media

- stormwater filtration systems. *Environ Sci Technol*. 2008;
- 550 30. Muthanna TM, Viklander M, Blecken G, Thorolfsson ST. Snowmelt pollutant removal in bioretention areas. *Water Res*. 2007;
- 552 31. Al-Ameri M, Hatt B, Le Coustumer S, Fletcher T, Payne E, Deletic A. Accumulation of heavy metals in stormwater bioretention media: A field study of temporal and spatial variation. *J Hydrol*. 2018;
- 554 32. Dieter HH, Frank D, Gühr R, Konietzka R, Moll B, Stockerl R, et al. Ableitung von Geringfügigkeitsschwellenwerten für das Grundwasser -- Aktualisierte und überarbeitete Fassung. Lawa [Internet]. 2016;28. Available from: [www.lawa.de](http://www.lawa.de)
- 556 33. Bartlett AJ, Rochfort Q, Brown LR, Marsalek J. Causes of toxicity to *Hyalella azteca* in a stormwater management facility receiving highway runoff and snowmelt. Part II: Salts, nutrients, and water quality. *Sci Total Environ*. 2012;
- 558 34. Callahan BJ, McMurdie PJ, Rosen MJ, Han AW, Johnson AJA, Holmes SP. DADA2: High-resolution sample inference from Illumina amplicon data. *Nat Methods*. 2016;
- 560 35. R Development Core Team R. R: A Language and Environment for Statistical Computing. R Foundation for Statistical Computing. 2011.
- 562 36. Jaric M, Segal J, Silva-Herzog E, Schnepfer L, Mathee K, Narasimhan G. Better primer design for metagenomics applications by increasing taxonomic distinguishability. In: *BMC Proceedings*. 2013.
- 564 37. Barraud O, Baclet MC, Denis F, Ploy MC. Quantitative multiplex real-time PCR for detecting class 1, 2 and 3 integrons. *J Antimicrob Chemother*. 2010;
- 566 38. Holmes AJ, Holley MP, Mahon A, Nield B, Gillings M, Stokes HW. Recombination activity of a distinctive integron-gene cassette system associated with *Pseudomonas stutzeri* populations in soil. *J Bacteriol*. 2003;
- 568 39. Rice P, Longden L, Bleasby A. EMBOSS: The European Molecular Biology Open Software Suite. *Trends in Genetics*. 2000.
- 570 572

40. Edgar RC. Search and clustering orders of magnitude faster than BLAST. *Bioinformatics*. 2010;
- 574 41. Zankari E, Hasman H, Cosentino S, Vestergaard M, Rasmussen S, Lund O, et al. Identification of  
acquired antimicrobial resistance genes. *J Antimicrob Chemother*. 2012;
- 576 42. Wallace JC, Port JA, Smith MN, Faustman EM. FARME DB: A functional antibiotic resistance element  
database. *Database*. 2017;
- 578 43. Pal C, Bengtsson-Palme J, Rensing C, Kristiansson E, Larsson DGJ. BacMet: Antibacterial biocide and  
metal resistance genes database. *Nucleic Acids Research*. 2014.
- 580 44. Bengtsson-Palme J. The diversity of uncharacterized antibiotic resistance genes can be predicted  
from known gene variants-but not always. *Microbiome*. 2018;
- 582 45. Pärnänen K, Karkman A, Hultman J, Lyra C, Bengtsson-Palme J, Larsson DGJ, et al. Maternal gut and  
breast milk microbiota affect infant gut antibiotic resistome and mobile genetic elements. *Nat*  
584 *Commun*. 2018;
46. El-Gebali S, Mistry J, Bateman A, Eddy SR, Luciani A, Potter SC, et al. The Pfam protein families  
586 database in 2019. *Nucleic Acids Res*. 2019;
47. Hammarén R, Pal C, Bengtsson-Palme J. FARAo: The flexible all-round annotation organizer.  
588 *Bioinformatics*. 2016;
48. McMurdie PJ, Holmes S. Phyloseq: An R Package for Reproducible Interactive Analysis and Graphics  
590 of Microbiome Census Data. *PLoS One*. 2013;
49. Oksanen J, Blanchet FG, Kindt R, Legendre P, Minchin PR, O'Hara RB. Package vegan. *R Packag ver*.  
592 2013;
50. Baselga A, Orme CDL. Betapart: An R package for the study of beta diversity. *Methods Ecol Evol*.  
594 2012;
51. Love MI, Huber W, Anders S. Moderated estimation of fold change and dispersion for RNA-seq data  
596 with DESeq2. *Genome Biol*. 2014;



52. Wang Y, Naumann U, Wright ST, Warton DI. Mvabund- an R package for model-based analysis of  
598 multivariate abundance data. *Methods Ecol Evol.* 2012;
53. Clarke KR, Ainsworth M. A method of linking multivariate community structure to environmental  
600 variables. *Mar Ecol Prog Ser.* 1993;
54. Anderson MJ. A new method for non-parametric multivariate analysis of variance. *Austral Ecol.*  
602 2001;
55. Helmreich B, Hilliges R, Schriewer A, Horn H. Runoff pollutants of a highly trafficked urban road -  
604 Correlation analysis and seasonal influences. *Chemosphere.* 2010;
56. Leung HD, Chen G, Sharma K. Effect of detached/re-suspended solids from sewer sediment on the  
606 sewage phase bacterial activity. *Water Sci Technol a J Int Assoc Water Pollut Res.* 2005;52(3):147–  
52.
- 608 57. Shanks OC, Newton RJ, Kelty CA, Huse SM, Sogin ML, McLellan SL. Comparison of the microbial  
community structures of untreated wastewaters from different geographic locales. *Appl Environ*  
610 *Microbiol.* 2013;
58. McLellan SL, Fisher JC, Newton RJ. The microbiome of urban waters. *International Microbiology.*  
612 2015.
59. Lauber CL, Hamady M, Knight R, Fierer N. Pyrosequencing-based assessment of soil pH as a predictor  
614 of soil bacterial community structure at the continental scale. *Appl Environ Microbiol.* 2009;
60. Abed RMM, Safi NMD, Köster J, De Beer D, El-Nahhal Y, Rullkötter J, et al. Microbial diversity of a  
616 heavily polluted microbial mat and its community changes following degradation of petroleum  
compounds. *Appl Environ Microbiol.* 2002;
- 618 61. Sánchez-Peinado M del M, González-López J, Martínez-Toledo MV, Pozo C, Rodelas B. Influence of  
linear alkylbenzene sulfonate (LAS) on the structure of Alphaproteobacteria, Actinobacteria, and  
620 Acidobacteria communities in a soil microcosm. *Environ Sci Pollut Res.* 2010;

62. Gremion F, Chatzinotas A, Harms H. Comparative 16S rDNA and 16S rRNA sequence analysis  
622 indicates that Actinobacteria might be a dominant part of the metabolically active bacteria in heavy  
metal-contaminated bulk and rhizosphere soil. *Environ Microbiol.* 2003;
- 624 63. Tang J, Zhang J, Ren L, Zhou Y, Gao J, Luo L, et al. Diagnosis of soil contamination using  
microbiological indices: A review on heavy metal pollution. *Journal of Environmental Management.*  
626 2019.
64. Kandeler E, Tschirko D, Bruce KD, Stemmer M, Hobbs PJ, Bardgett RD, et al. Structure and function  
628 of the soil microbial community in microhabitats of a heavy metal polluted soil. *Biol Fertil Soils.*  
2000;
- 630 65. Kaurin A, Cernilogar Z, Lestan D. Revitalisation of metal-contaminated, EDTA-washed soil by addition  
of unpolluted soil, compost and biochar: Effects on soil enzyme activity, microbial community  
632 composition and abundance. *Chemosphere.* 2018;
66. Kandeler E, Kampichler C, Horak O. Influence of heavy metals on the functional diversity of soil  
634 microbial communities. *Biol Fertil Soils.* 1996;
67. Fließbach A, Sarig S, Steinberger Y. Effects of water pulses and climatic conditions on microbial  
636 biomass kinetics and microbial activity in a yermosol of the central negev. *Arid Soil Res Rehabil.*  
1994;
- 638 68. Chander K, Brookes PC, Harding SA. Microbial biomass dynamics following addition of metal-  
enriched sewage sludges to a sandy loam. *Soil Biol Biochem.* 1995;
- 640 69. Zhang J, Hua P, Krebs P. The build-up dynamic and chemical fractionation of Cu, Zn and Cd in road-  
deposited sediment. *Sci Total Environ.* 2015;
- 642 70. Teiri H, Rezaei M, Nazmara S, Hajizadeh Y. Sulphate reduction and zinc precipitation from  
wastewater by sulphate-reducing bacteria in an anaerobic moving-liquid/static-bed bioreactor.  
644 *Desalin Water Treat [Internet].* 2016 Nov 13;57(53):25617–26. Available from:  
<https://doi.org/10.1080/19443994.2016.1153983>

- 646 71. D'Aoust PM, Pick FR, Wang R, Poulain A, Rennie C, Chen L, et al. Sulfide production kinetics and  
model of Stormwater retention ponds. *Water Sci Technol.* 2018;
- 648 72. Zhang B, Xu X, Zhu L. Structure and function of the microbial consortia of activated sludge in typical  
municipal wastewater treatment plants in winter. *Sci Rep.* 2017;
- 650 73. Schmidt T, Schlegel HG. Nickel and cobalt resistance of various bacteria isolated from soil and highly  
polluted domestic and industrial wastes. *FEMS Microbiol Lett.* 1989;
- 652 74. Alboghobeish H, Tahmourespour A, Doudi M. The study of Nickel Resistant Bacteria (NiRB) isolated  
from wastewaters polluted with different industrial sources. *J Environ Heal Sci Eng.* 2014;
- 654 75. Nies DH. Resistance to cadmium, cobalt, zinc, and nickel in microbes. *Plasmid.* 1992;
76. Pérez-Cataluña A, Salas-Massó N, Diéguez AL, Balboa S, Lema A, Romalde JL, et al. Revisiting the  
656 taxonomy of the genus *Arcobacter*: Getting order from the chaos. *Front Microbiol.* 2018;
77. Assanta MA, Roy D, Lemay MJ, Montpetit D. Attachment of *Arcobacter butzleri*, a new waterborne  
658 pathogen, to water distribution pipe surfaces. *J Food Prot.* 2002;
78. Cervenka L, Kristlova J, Peskova I, Vytrasova J, Pejchalova M, Brozkova I. Persistence of *Arcobacter*  
660 *butzleri* CCUG 30484 on plastic, stainless steel and glass surfaces. *Brazilian J Microbiol.* 2008;
79. Gillings MR, Gaze WH, Pruden A, Smalla K, Tiedje JM, Zhu YG. Using the class 1 integron-integrase  
662 gene as a proxy for anthropogenic pollution. *ISME J.* 2015;
80. Rehman A, Anjum MS. Multiple metal tolerance and biosorption of cadmium by *Candida tropicalis*  
664 isolated from industrial effluents: Glutathione as detoxifying agent. In: *Environmental Monitoring  
and Assessment.* 2011.
- 666 81. Zafar S, Aqil F, Ahmad I. Metal tolerance and biosorption potential of filamentous fungi isolated  
from metal contaminated agricultural soil. *Bioresour Technol.* 2007;
- 668 82. Pal C, Bengtsson-Palme J, Kristiansson E, Larsson DGJ. Co-occurrence of resistance genes to  
antibiotics, biocides and metals reveals novel insights into their co-selection potential. *BMC*

- 670 Genomics. 2015;
83. Silver S, Phung LT. Bacterial heavy metal resistance: New surprises. Annual Review of Microbiology.  
672 1996.
84. Ruiz N, Montero T, Hernandez-Borrell J, Viñas M. The role of *Serratia marcescens* porins in antibiotic  
674 resistance. Microb Drug Resist. 2003;
85. Nies DH. Efflux-mediated heavy metal resistance in prokaryotes. FEMS Microbiology Reviews. 2003.
- 676 86. Levy SB. Active efflux, a common mechanism for biocide and antibiotic resistance. In: Journal of  
Applied Microbiology Symposium Supplement. 2002.
- 678 87. Stepanauskas R, Glenn TC, Jagoe CH, Tuckfield RC, Lindell AH, McArthur J V. Elevated microbial  
tolerance to metals and antibiotics in metal-contaminated industrial environments. Environ Sci  
680 Technol. 2005;
88. Bengtsson-Palme J, Kristiansson E, Larsson DGJ. Environmental factors influencing the development  
682 and spread of antibiotic resistance. FEMS Microbiology Reviews. 2018.
89. Nakamura Y, Itoh T, Matsuda H, Gojobori T. Biased biological functions of horizontally-transferred  
684 genes in prokaryotic genomes. Nat Genet. 2004;
90. Thomas CM, Nielsen KM. Mechanisms of, and barriers to, horizontal gene transfer between  
686 bacteria. Nature Reviews Microbiology. 2005.
91. Li LG, Xia Y, Zhang T. Co-occurrence of antibiotic and metal resistance genes revealed in complete  
688 genome collection. ISME J. 2017;
92. Stokes HW, Hall RM. A novel family of potentially mobile DNA elements encoding site-specific gene-  
690 integration functions: integrons. Mol Microbiol. 1989;
93. He LY, Liu YS, Su HC, Zhao JL, Liu SS, Chen J, et al. Dissemination of antibiotic resistance genes in  
692 representative broiler feedlots environments: Identification of indicator ARGs and correlations with  
environmental variables. Environ Sci Technol. 2014;

- 694 94. Su JQ, Wei B, Ou-Yang WY, Huang FY, Zhao Y, Xu HJ, et al. Antibiotic Resistome and Its Association  
with Bacterial Communities during Sewage Sludge Composting. *Environ Sci Technol*. 2015;
- 696 95. Wang P, Wu D, You X, Li W, Xie B. Distribution of antibiotics, metals and antibiotic resistance genes  
during landfilling process in major municipal solid waste landfills. *Environ Pollut*. 2019;
- 698 96. Nikaido H. Multidrug resistance in bacteria. *Annual Review of Biochemistry*. 2009.
97. Chakraborty AK. Multi-Drug Resistant Genes in Bacteria and 21st Century Problems Associated with  
700 Antibiotic Therapy. *Biotechnol An Indian J*. 2016;
98. Schuler MS, Relyea RA. A Review of the Combined Threats of Road Salts and Heavy Metals to  
702 Freshwater Systems. *BioScience*. 2018.
99. Acosta JA, Jansen B, Kalbitz K, Faz A, Martínez-Martínez S. Salinity increases mobility of heavy metals  
704 in soils. *Chemosphere*. 2011;
100. Cavicchioli R, Ripple WJ, Timmis KN, Azam F, Bakken LR, Baylis M, et al. Scientists' warning to  
706 humanity: microorganisms and climate change. *Nature Reviews Microbiology*. 2019.

## Tables

**Table 1.** Chemical analysis of the water and filter media samples, reported as median (25%–75%); total concentrations of Cr, Cu, Ni, Pb, and Zn are presented. EC: electric conductivity, and WPI<sub>GFS</sub>: water pollution index. The WPI<sub>GFS</sub> was added to summarize the contamination level of the samples. I: Influent; ESA: Effluent of device D1; FD1: Filter material of D1; FD2: filter material of D2; EF: Effluent of device D2.

| Variable        | Category          | Sample size | pH (-) | EC (µS/cm)       | Cr (µg/L)          | Cu (µg/L)                               | Ni (µg/L)                               | Pb (µg/L)                               | Zn (µg/L)                               | WPI <sub>GFS</sub> (-)                  |                  |
|-----------------|-------------------|-------------|--------|------------------|--------------------|-----------------------------------------|-----------------------------------------|-----------------------------------------|-----------------------------------------|-----------------------------------------|------------------|
| Water<br>(n=41) | Sampling position | I           | 21     | 7.7<br>(7.5-7.9) | 85.9<br>(73.2–120) | 7.6<br>(1.3–23.6) <sup>b</sup>          | 56.2<br>(44.0–102)                      | 5.9<br>(3.2–8.6)                        | 4.5<br>(2.0–9.7)                        | 150<br>(98.1–300)                       | 3.6<br>(2.6–8.3) |
|                 |                   | ESA         | 12     | 7.6<br>(7.5-7.7) | 176<br>(127–278)   | 8.2<br>(1.0–11.0) <sup>b</sup>          | 47.9<br>(25.2–77.8)                     | 5.5<br>(3.9–6.8)                        | 2.9<br>(1.3–6.4)                        | 134<br>(87–216)                         | 3.2<br>(1.6–6.7) |
|                 |                   | EF          | 8      | 7.7<br>(7.7-7.8) | 168<br>(129–174)   | 3.8<br>(1.0–6.5) <sup>b</sup>           | 40.1<br>(23.2–44.6)                     | 2.8<br>(2.0–3.3)                        | 1.2<br>(0.5–2.2)                        | 45.3<br>(33.9–61.9)                     | 2.1<br>(1.6–2.6) |
|                 | Season            | Spring      | 19     | 7.7<br>(7.6-7.8) | 144<br>(115-238)   | 6.8<br>(1.0-17.0) <sup>b</sup>          | 50.1<br>(31.9-120)                      | 4.1<br>(2.5-8.7)                        | 2.7<br>(1.4-8.7)                        | 116<br>(77.7-378)                       | 3.4<br>(1.8-8.3) |
|                 |                   | Summer      | 13     | 7.9<br>(7.5-8.1) | 94.7<br>(79.2-139) | 7.6<br>(1.5-18.1) <sup>b</sup>          | 50.7<br>(42.9-71.7)                     | 4.1<br>(3.0-5.9)                        | 3.3<br>(2.4-7.1)                        | 143<br>(77.7-205)                       | 3.1<br>(2.3-6.7) |
|                 |                   | Autumn      | 9      | 7.5<br>(7.3-7.7) | 74.8<br>(66.8-136) | 5.3<br>(1.0-8.1) <sup>b</sup>           | 46.0<br>(20.3-60.9)                     | 6.6<br>(3.0-7.5)                        | 2.2<br>(1.5-4.7)                        | 91.2<br>(57.0-147)                      | 2.7<br>(1.4-4.2) |
|                 |                   |             |        |                  |                    | <b>Cr<sup>a</sup></b><br><b>(mg/kg)</b> | <b>Cu<sup>a</sup></b><br><b>(mg/kg)</b> | <b>Ni<sup>a</sup></b><br><b>(mg/kg)</b> | <b>Pb<sup>a</sup></b><br><b>(mg/kg)</b> | <b>Zn<sup>a</sup></b><br><b>(mg/kg)</b> |                  |
| Filter media    | FD1               | 2           |        |                  | 7.5 <sup>b</sup>   | 32.9                                    | 42.0                                    | <10                                     | 274                                     |                                         |                  |
| I               | FD2               | 2           |        |                  | 22.4               | 41.1                                    | 11.7                                    | <10                                     | 333                                     |                                         |                  |

<sup>a</sup> mean of duplicate, <sup>b</sup> contains value below limit of quantification (LOQ), which was substituted by the value of the LOQ

**Table 2.** Water and filter media samples characteristics and statistical analysis for the different samples. I: Influent; ESA: Effluent of device D1; FD1: Filter material of D1; FD2: filter material of D2; EF: Effluent of device D2.

| Variable                        | Category                 | Sample size   | ASV richness | Shannon index | Biomass<br>(copies x ml)      | <i>IntI1</i><br>(copies x ml) |                                |
|---------------------------------|--------------------------|---------------|--------------|---------------|-------------------------------|-------------------------------|--------------------------------|
| <i>Water</i> (n=41)             | <i>I</i>                 | 21            | 2601         | 4.92±0.3      | 1.75 x 10 <sup>9</sup> ± 1.57 | 2.04 x 10 <sup>4</sup> ± 5.11 |                                |
|                                 | <i>Sampling position</i> | <i>ESA</i>    | 12           | 1927          | 4.72±0.6                      | 2.73 x 10 <sup>9</sup> ± 2.73 | 6.43 x 10 <sup>4</sup> ± 10.0  |
|                                 |                          | <i>EF</i>     | 8            | 2259          | 5.32±0.4                      | 7.44 x 10 <sup>8</sup> ± 10.0 | 5.01 x 10 <sup>3</sup> ± 9.96  |
|                                 |                          | <i>Spring</i> | 19           | 2481          | 4.8±0.5                       | 2.78 x 10 <sup>9</sup> ± 2.35 | 3.51 x 10 <sup>4</sup> ± 4.96  |
|                                 | <i>Season</i>            | <i>Summer</i> | 13           | 2796          | 5.1±0.4                       | 8.69 x 10 <sup>8</sup> ± 6.75 | 1.08 x 10 <sup>4</sup> ± 1.59  |
|                                 |                          | <i>Autumn</i> | 9            | 1428          | 4.7±0.5                       | 1.48 x 10 <sup>9</sup> ± 1.32 | 5.03 x 10 <sup>4</sup> ± 12.11 |
| <i>Filter material</i><br>(n=6) | <i>FD1</i>               | 3             | 848          | 5.3±0.03      | 2.72 x 10 <sup>7</sup> ± 1.22 | 2.62 x 10 <sup>7</sup> ± 0.67 |                                |
|                                 | <i>FD2</i>               | 3             | 1486         | 6.1±0.1       | 2.58 x 10 <sup>7</sup> ± 2.59 | 2.67 x 10 <sup>6</sup> ± 1.95 |                                |

**Table 3.** Kruskal-Wallis test employed to identify statistical differences in bacterial richness (ASV), diversity (Shannon), biomass and *Intl1* gene copies between different environmental variables, sampling position and SQIDs design. To test differences among environmental variables (seasons) and sampling position (influent vs effluent) only water samples were considered (I, ESA, EF, n=41), while to test differences between SQIDs biofilm, only filter samples were taken into account. P-value significance codes: < 0.001 \*\*\*; < 0.01 \*\*; < 0.05 \*. n.a. (not applicable).

|                         | Shannon |             |                  | Biomass<br>log(16S gene copies/mL) |              | <i>Intl1</i><br>log(intl1 copies/mL) |                  |
|-------------------------|---------|-------------|------------------|------------------------------------|--------------|--------------------------------------|------------------|
|                         | n       | Chi-squared | increased in     | Chi-squared                        | increased in | Chi-squared                          | Increased in     |
| Seasons (in effluents)  | 20      | 1.82        | n.a.             | 3.24                               | n.a.         | 2.40                                 | n.a.             |
| D1 Influent vs effluent | 24      | 1.76        | n.a.             | 0.65                               | n.a.         | 3.88*                                | Effluent (+2.01) |
| D2 Influent vs effluent | 17      | 4.28*       | Effluent (+1.09) | 3                                  | n.a.         | 0.85                                 | n.a.             |
| ESA vs EF               | 20      | 5.00*       | EF (+1.12)       | 4.50*                              | ESA (+3.67)  | 11.6***                              | ESA (+12.8)      |
| D1 vs D2 biofilm        | 6       | 3.97*       | D2 (+1.16)       | 0.04                               | n.a.         | 3.85*                                | D1 (+9.82)       |



# Figures

**Figure 1.** Distribution bar plot of the relative abundance of bacterial groups at Phylum (A) and Genus (B) level in untreated and treated road runoff and SQIDs' filter media. For better representation only taxa with relative abundance > 2% are displayed. I: Influent, ES: effluent of sedimentation, SA: effluent of sedimentation and adsorption, EF: effluent of filtration; FD1: filter material of D1; FD2: filter material of D2 (D1 and D2 as depicted in Figure 1.)

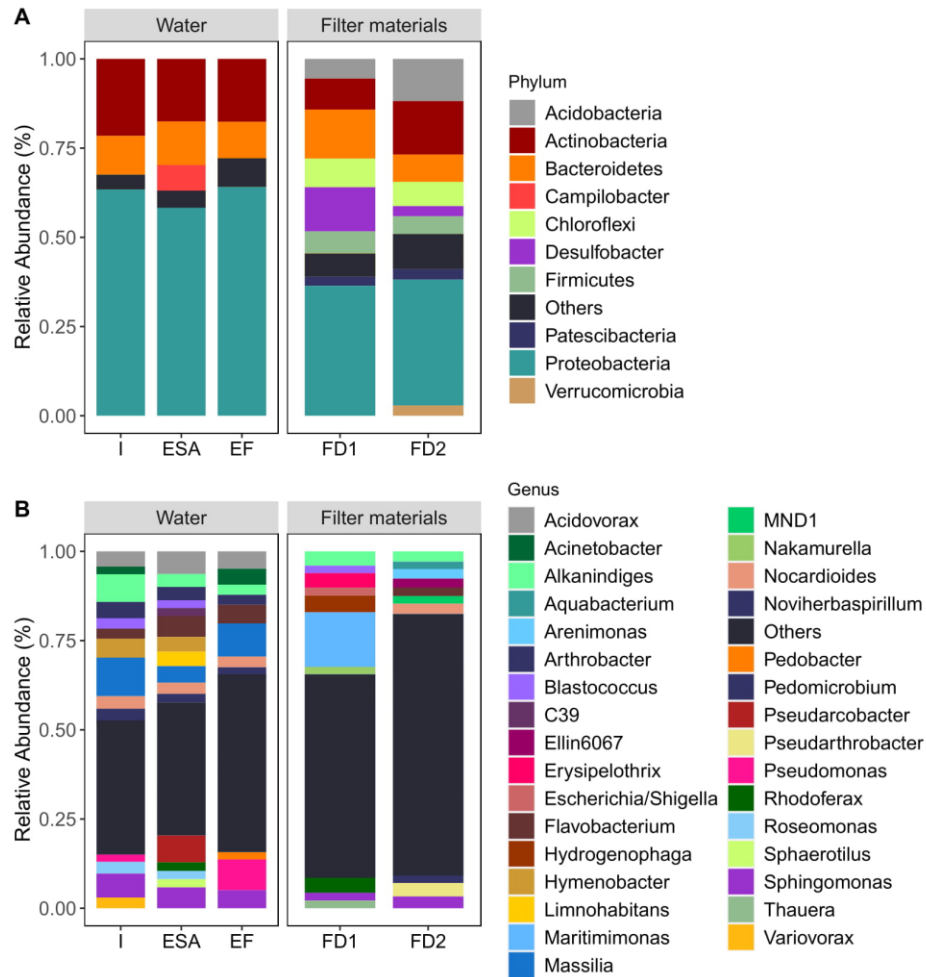

**Figure 2.** Non-metric multidimensional scaling (NMDS) based on Bray-Curtis dissimilarity of SQIDs effluents community data (n=20) and environmental factors. ESA: effluent of sedimentation and adsorption, EF: effluent of filtration. The correlation between species and environmental variables are indicated by a perpendicular projection of the species arrow-tips onto the line overlaying the environmental variable arrow.

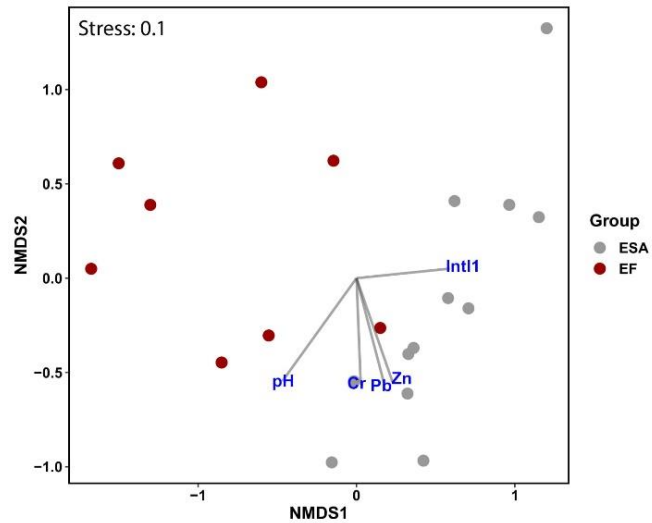

**Figure 3.** Spearman correlations between biomass normalized *intl1* and heavy metals in SQIDs effluent water samples (n=20, nickel (A), zinc (B), lead (C)).

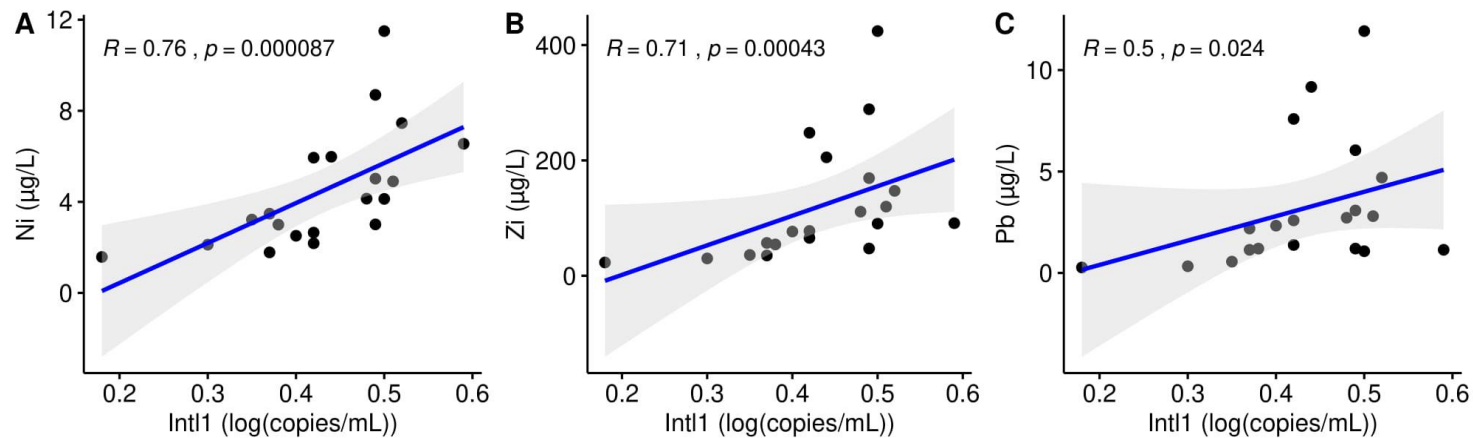

**Figure 4.** Heat map of Spearman correlation analysis between relative abundance of water effluents (n = 20) bacterial community and content of heavy metals at Phylum (A) and Genus level (B). Colors depict individual negative and positive correlations.

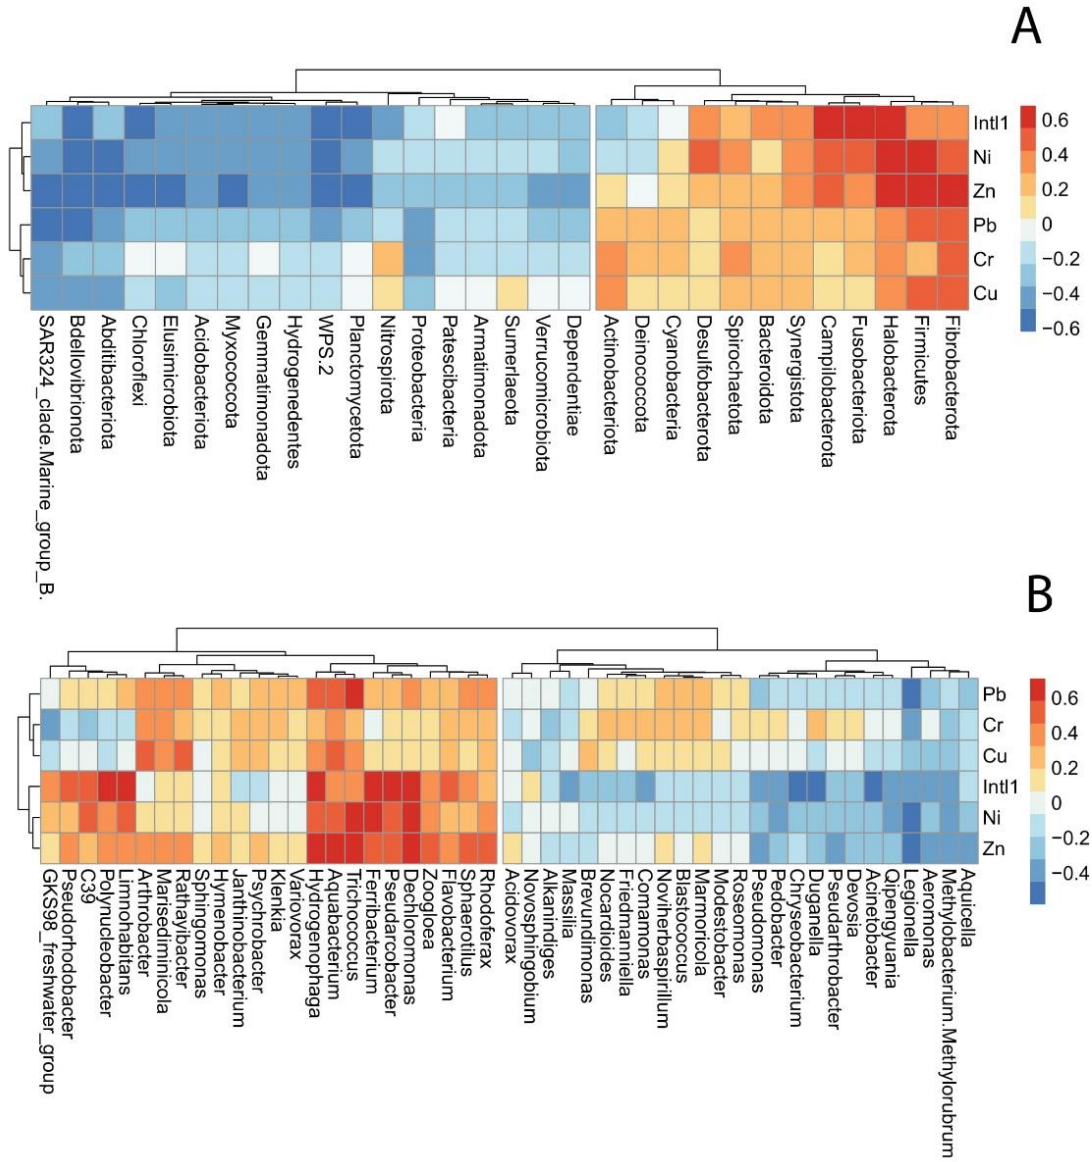

**Figure 5.** Distribution of different types of resistance genes in the class I integron gene cassette sequences

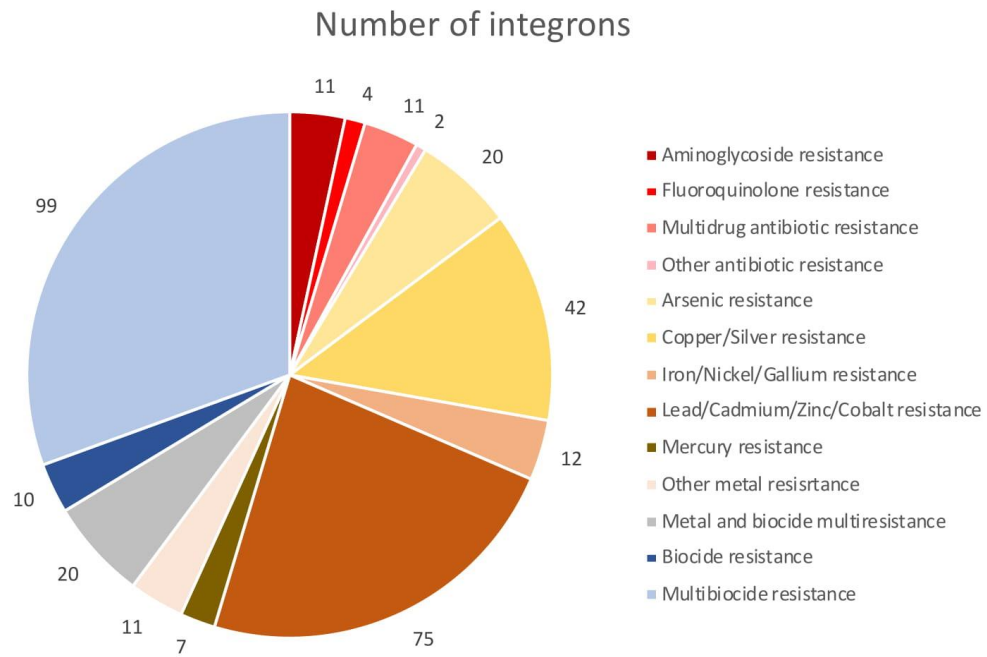

Source: https://www.biorxiv.org/content/biorxiv/early/2021/01/12/2021.01.12.426166.full.pdf
